# Supplementary material
Source: MDPI journal article supplement (https://www.mdpi.com/2311-5637/9/5/460)
Supplement: s1 [file s1]

**Table S1.** Oligopeptide, di-/tripeptide and amino acid transport systems of *L.helveticus* H-9 and *L.paracasei* ABK

| Gene                                                   | <i>Lb. helveticus</i> H-9                            | <i>Lb. paracasei</i> ABK                                           | Comment                                                                                       |
|--------------------------------------------------------|------------------------------------------------------|--------------------------------------------------------------------|-----------------------------------------------------------------------------------------------|
| <b>ABC-type oligopeptide transport system Opp:</b>     |                                                      |                                                                    |                                                                                               |
| <i>oppA</i>                                            | MBU6033698                                           | MBU6046676                                                         | SBP_bac_5, ABC transporter substrate-binding protein                                          |
| <i>oppA</i>                                            | MBU6033699                                           | MBU6047988                                                         | SBP_bac_5, ABC transporter substrate-binding protein                                          |
| <i>oppA</i>                                            | no*                                                  | MBU6048244                                                         | SBP_bac_5, ABC transporter substrate-binding protein                                          |
| <i>oppC5</i>                                           | MBU6033697                                           | no                                                                 | BPD_transp_1,OppC_N Binding-protein-dependent transport system inner membrane component       |
| <i>oppC</i>                                            | no                                                   | MBU6046118                                                         | BPD_transp_1,OppC_N Binding-protein-dependent transport system inner membrane component       |
| <i>oppB</i>                                            | MBU6033696                                           | MBU6046119                                                         | BPD_transp_1, ABC transporter permease                                                        |
| <i>oppF</i>                                            | MBU6033695                                           | MBU6046120                                                         | ABC_tran, oligo_HPY Belongs to the ABC transporter superfamily                                |
| <i>oppD</i>                                            | MBU6033694                                           | MBU6046121                                                         | ABC_tran, oligo_HPY Belongs to the ABC transporter superfamily                                |
| <b>ABC-type di-/tripeptide transport system Dpp:</b>   |                                                      |                                                                    |                                                                                               |
| <i>Dpp</i>                                             | no                                                   | no                                                                 |                                                                                               |
| <b>Di-/tripeptide proton-coupled transporter DtpT:</b> |                                                      |                                                                    |                                                                                               |
| <i>DtpT</i>                                            | no                                                   | MBU6047829                                                         | PTR2, amino acid peptide transporter                                                          |
| <b>ABC-type amino acid transport system:</b>           |                                                      |                                                                    |                                                                                               |
| <i>glnQ</i>                                            | MBU6034061<br>MBU6034081<br>MBU6034193<br>MBU6035110 | MBU6046694<br>MBU6046704<br>MBU6046753<br>MBU6047174<br>MBU6047247 | ABC transporter, ATP-binding protein; ABC-type glutamine transport system ATP-binding protein |
| <i>glnPH2</i>                                          | MBU6034080                                           | MBU6047175                                                         | ABC transporter permease glutamine transport system                                           |
| <i>glnP7</i>                                           | MBU6034194                                           | no                                                                 | ABC transporter permease glutamine transport system                                           |
| <i>glnP9</i>                                           | MBU6034195                                           | no                                                                 | ABC transporter, permease protein                                                             |
| <i>glnP</i>                                            | MBU6035107                                           | MBU6046692<br>MBU6046693<br>MBU6047244                             | ABC transporter permease                                                                      |
| <i>glnM</i>                                            | MBU6035108                                           | MBU6047245                                                         | ABC transporter permease                                                                      |
| <i>glnH</i>                                            | MBU6035109                                           | MBU6047246                                                         | ABC transporter substrate-binding protein                                                     |

|                                                                     |                          |                                                      |                                                                                                                                                          |
|---------------------------------------------------------------------|--------------------------|------------------------------------------------------|----------------------------------------------------------------------------------------------------------------------------------------------------------|
| <i>proV</i>                                                         | no                       | MBU6046863                                           | ABC transporter, ATP-binding protein; ABC-type proline/glycine betaine transport system ATP-binding protein                                              |
| <i>metN</i>                                                         | MBU6034603               | MBU6046651                                           | ABC_tran, NIL, Part of the ABC transporter complex MetNIQ involved in <b>methionine import</b> . Responsible for energy coupling to the transport system |
| <i>livM</i>                                                         | no                       | MBU6048020                                           | BPD_transp_2, Branched-chain amino acid transport system / permease component<br>Branched chain amino acid ABC transporter permease LivM                 |
| <b>Amino acid permease:</b>                                         |                          |                                                      |                                                                                                                                                          |
| <i>ydaO</i>                                                         | no                       | MBU6046361                                           | Amino acid permease<br>AA_permease_2                                                                                                                     |
| <i>yhdG</i>                                                         | MBU6033810               | MBU6046100                                           | AA_permease_2                                                                                                                                            |
| --                                                                  | MBU6033960<br>MBU6035006 | MBU6046991<br>MBU6047014<br>MBU6047417<br>MBU6048255 | Amino acid permease                                                                                                                                      |
| <i>ctrA</i>                                                         | MBU6033705               | no                                                   | AA_permease_2 branched-chain amino acid permease                                                                                                         |
| <i>lysP</i>                                                         | no                       | MBU6047170                                           | AA_permease                                                                                                                                              |
| <i>steT</i>                                                         | MBU6034692               | no                                                   | AA_permease_2                                                                                                                                            |
| <i>aapA</i>                                                         | MBU6033958               | no                                                   | Amino acid permease                                                                                                                                      |
| <i>yagE</i>                                                         | no                       | MBU6047952                                           | Amino acid permease                                                                                                                                      |
| <i>cycA</i>                                                         | MBU6034554               | MBU6048008                                           | Amino acid permease                                                                                                                                      |
| <i>yifK</i>                                                         | MBU6033959<br>MBU6035116 | MBU6048142                                           | Amino acid permease                                                                                                                                      |
| <i>ybeC</i>                                                         | no                       | MBU6048163                                           | AA_permease_2                                                                                                                                            |
| <b>BCAA transport system carrier II proteins (MFS superfamily):</b> |                          |                                                      |                                                                                                                                                          |
| <i>brnQ</i>                                                         | MBU6035150               | MBU6047394<br>MBU6047892                             | Branch_AA_trans, Component of the transport system for branched-chain amino acids (BCAAs)                                                                |
| <b>Amino acid exporter:</b>                                         |                          |                                                      |                                                                                                                                                          |
| <i>thrE</i>                                                         | MBU6034728               | MBU6048018<br>MBU6047532                             | ThrE_2 Threonine/Serine exporter                                                                                                                         |
| <i>thrE</i>                                                         | MBU6034727               | MBU6048017                                           | Putative threonine/serine exporter                                                                                                                       |
| <i>thrE</i>                                                         | MBU6034897               | MBU6047843                                           | Putative threonine/serine exporter, ThrE_2                                                                                                               |
| <i>labL</i>                                                         | no                       | MBU6047531                                           | ThrE, Putative threonine/serine exporter                                                                                                                 |
| <i>yqjA</i>                                                         | no                       | MBU6048043                                           | ArAE_1,ArAE_1_C<br>Putative aromatic acid exporter C-terminal domain                                                                                     |
| <i>cydC</i>                                                         | no                       | MBU6046392                                           | ABC_membrane,ABC_tran<br>ABC transporter, CydDC cysteine exporter (CydDC-E) family,                                                                      |

|               |           |            |                                                                                                           |
|---------------|-----------|------------|-----------------------------------------------------------------------------------------------------------|
|               |           |            | permease ATP-binding protein<br>CydD                                                                      |
| <i>cydD</i>   | no        | MBU6046393 | ABC transporter, CydDC <b>cysteine exporter</b> (CydDC-E) family,<br>permease ATP-binding protein<br>CydC |
| <b>Total:</b> | <b>30</b> | <b>43</b>  |                                                                                                           |

no\* – not found

**Table S2.** Carbohydrate transport systems of *L. helveticus* H-9 and *L. paracasei* ABK

| Gene            | <i>Lb.helveticus</i> H-9 | <i>Lb.paracasei</i> ABK                              | Comment                                                                                                                                                                                         |
|-----------------|--------------------------|------------------------------------------------------|-------------------------------------------------------------------------------------------------------------------------------------------------------------------------------------------------|
| <i>treB</i>     | MBU6034129               | MBU6047415<br>MBU6048282                             | TreB, the trehalose PTS permease, belongs to the functional superfamily of the phosphoenolpyruvate (PEP)-dependent, sugar transporting phosphotransferase system PTS_EIIA_1, PTS_EIIB, PTS_EIIC |
| <i>lacE</i>     | no*                      | MBU6048344                                           | PTS_EIIC,PTS_IIB<br>Phosphotransferase system, EIIC                                                                                                                                             |
| <i>lacF</i>     | no                       | MBU6048346                                           | PTS_IIA<br>PTS system, <b>Lactose/Cellobiose</b> specific IIA subunit                                                                                                                           |
| --              | no                       | MBU6047235<br>MBU6048143<br>MBU6048257<br>MBU6048450 | PTS_IIB<br>PTS system, Lactose/Cellobiose specific IIB subunit                                                                                                                                  |
| <i>mtIA</i>     | no                       | MBU6047960                                           | PTS_EIIC, PTS_IIB<br>PTS system, Lactose/Cellobiose specific IIB subunit                                                                                                                        |
| <i>ptcB</i>     | no                       | MBU6046350<br>MBU6047980                             | PTS_IIB<br>PTS system, Lactose/Cellobiose specific IIB subunit                                                                                                                                  |
| <i>pts13C</i>   | MBU6033953               | no                                                   | PTS_EIIC<br>The phosphoenolpyruvate-dependent sugar phosphotransferase system (PTS), a major carbohydrate active - transport system, cellobiose-specific EIIC component                         |
| <i>pts20B</i>   | no                       | MBU6046721                                           | PTS_IIB PTS system,<br>Lactose/Cellobiose specific IIB subunit                                                                                                                                  |
| <i>pts26BCA</i> | no                       | MBU6046607                                           | PTS_EIIA_1,PTS_EIIB,PTS_EIIC<br>phosphotransferase system<br>sucrose-specific sucrose PTS system<br>EIIBCA or EIIBC component<br>[EC:2.7.1.211]                                                 |
| <i>pts33BCA</i> | MBU6034053               | no                                                   | PTS_EIIA_1,PTS_EIIB,PTS_EIIC<br>ko:K02755,ko:K02756,ko:K02757<br>beta-glucoside PTS system EIICBA<br>component [EC:2.7.1.-]<br><b>β-glucosides</b> PTS, EIIBCA<br>(EC:2.7.1.69)                 |
| <i>pts36A</i>   | no                       | MBU6048451                                           | PTS_EIIA_2 Phosphoenolpyruvate-dependent sugar phosphotransferase system, EIIA 2                                                                                                                |
| <i>pts36C</i>   | no                       | MBU6048449                                           | PTS system sugar-specific permease component EIIC-GAT                                                                                                                                           |
| <i>ptbA</i>     | MBU6034508               | no                                                   | PTS_EIIA_1 phosphoenolpyruvate-dependent sugar phosphotransferase system, EIIA 1                                                                                                                |
| --              | MBU6034560               | no                                                   | PTS_EIIA_1 phosphoenolpyruvate-                                                                                                                                                                 |

|               |            |                                        |                                                                                                    |
|---------------|------------|----------------------------------------|----------------------------------------------------------------------------------------------------|
|               | MBU6035235 |                                        | dependent sugar phosphotransferase system, EIIA 1                                                  |
| --            | MBU6034840 | MBU6047236<br>MBU6048144<br>MBU6048322 | PTS_EIIA_2 Phosphoenolpyruvate-dependent sugar phosphotransferase system, EIIA 2                   |
| <i>chbA</i>   | no         | MBU6047772                             | PTS_IIA phosphoenolpyruvate-dependent sugar phosphotransferase system                              |
| <i>chbC</i>   | MBU6034783 | MBU6046722                             | PTS_EIIC phosphoenolpyruvate-dependent sugar phosphotransferase system (PTS)                       |
| <i>fruA</i>   | no         | MBU6046468                             | PTS_EIIA_2,PTS_EIIC,PTS_IIB Phosphotransferase System                                              |
| <i>fruC</i>   | no         | MBU6048336                             | PTS_EIIA_2,PTS_EIIC,PTS_IIB                                                                        |
| <i>dhaM</i>   | no         | MBU6046975                             | EIIA-man<br>PTS system fructose IIA component                                                      |
| --            | no         | MBU6048173                             | EIIA-man<br>PTS system fructose IIA component                                                      |
| <i>pfoSR</i>  | no         | MBU6046559                             | PTS_EIIC_2 Phosphotransferase system, EIIC                                                         |
| <i>pfoS/R</i> | no         | MBU6046913                             | PTS_EIIC_2 Phosphotransferase system, EIIC                                                         |
| <i>manL</i>   | MBU6034559 | MBU6046709                             | EIIA-man, PTSIIB_sorb<br>PTS system <b>sorbose</b> subfamily IIB component                         |
| <i>manM</i>   | no         | MBU6046710                             | EII-Sor<br>PTS system                                                                              |
| <i>manN</i>   | MBU6034557 | MBU6046711                             | EIID-AGA<br>PTS system, mannose fructose <b>sorbose</b> family IID component                       |
| <i>manR</i>   | no         | MBU6047616                             | HTH_11,Mga,PRD,PTS_EIIA_2,PTS_IIB<br>phosphoenolpyruvate-dependent sugar phosphotransferase system |
| <i>manY</i>   | MBU6034558 | no                                     | EII-Sor<br>PTS system                                                                              |
| <i>celC</i>   | no         | MBU6046720<br>MBU6047979               | PTS system, Lactose Cellobiose specific IIA subunit                                                |
| <i>celD</i>   | no         | MBU6047977                             | PTS_EIIC phosphoenolpyruvate-dependent sugar phosphotransferase system (PTS)                       |
| <i>bglH</i>   | no         | MBU6048049                             | PTS_EIIA_1,PTS_EIIB,PTS_EIIC<br>phosphotransferase system                                          |
| --            | no         | MBU6047953                             | protein-N(PI)-phosphohistidine-lactose phosphotransferase system<br>transporter activity           |
| --            | no         | MBU6048320                             | PTS_IIB Phosphotransferase system,<br>galactitol-specific IIB component                            |
| --            | no         | MBU6048056<br>MBU6048169               | PTSIIB_sorb<br>PTS system sorbose subfamily IIB component                                          |
| --            | no         | MBU6048057<br>MBU6048171               | EIID-AGA PTS system<br><b>mannose/fructose/sorbose</b> family IID component                        |

|                   |            |                                        |                                                                       |
|-------------------|------------|----------------------------------------|-----------------------------------------------------------------------|
| <i>XK27_08455</i> | no         | MBU6048058                             | EII-Sor<br>PTS system sorbose-specific IIC<br>component               |
| --                | no         | MBU6048170                             | EII-Sor<br>PTS system <b>sorbose-specific</b> IIC<br>component        |
| <i>gatC</i>       | no         | MBU6047234                             | EIIC-GAT<br>PTS system sugar-specific permease<br>component           |
| --                | no         | MBU6048258<br>MBU6048286<br>MBU6048321 | EIIC-GAT<br>PTS system sugar-specific permease<br>component           |
| <i>srlB</i>       | no         | MBU6047947                             | PTSIIA_gutA<br>PTS system glucitol/sorbitol-specific<br>IIA component |
| <i>ptsI</i>       | MBU6035138 | MBU6046257                             | PEP-utilisers_N, PEP-utilizers, PEP-<br>utilizers_C                   |
| <i>ptsH</i>       | MBU6035139 | MBU6046258                             | PTS-HPr<br>phosphocarrier protein HPR                                 |
| <i>hprK</i>       | MBU6033848 | MBU6046810                             | Hpr_kinase_C,Hpr_kinase_N                                             |
| <b>Total:</b>     | <b>14</b>  | <b>50</b>                              |                                                                       |

no\* – not found
