# Supplementary material
Source: MDPI journal article supplement (https://www.mdpi.com/2311-5637/9/5/460)
Supplement: s1 [file s1]

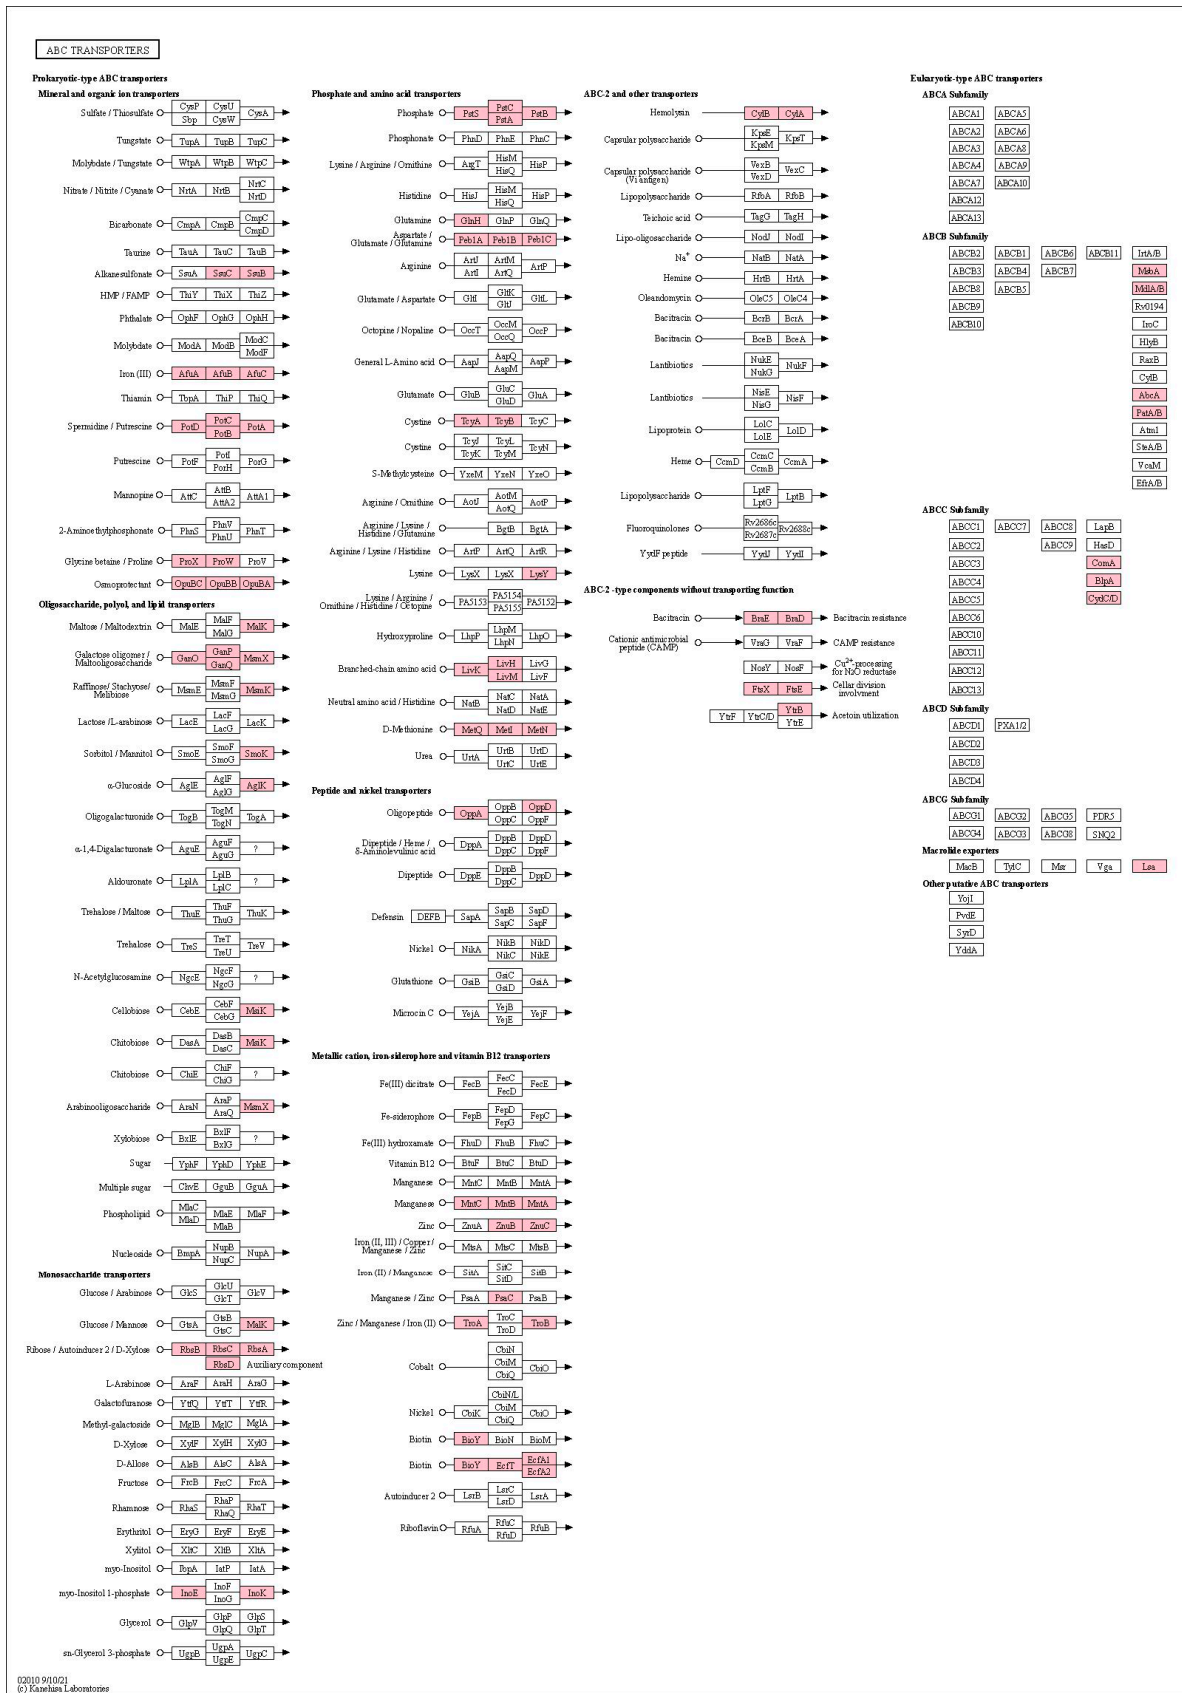

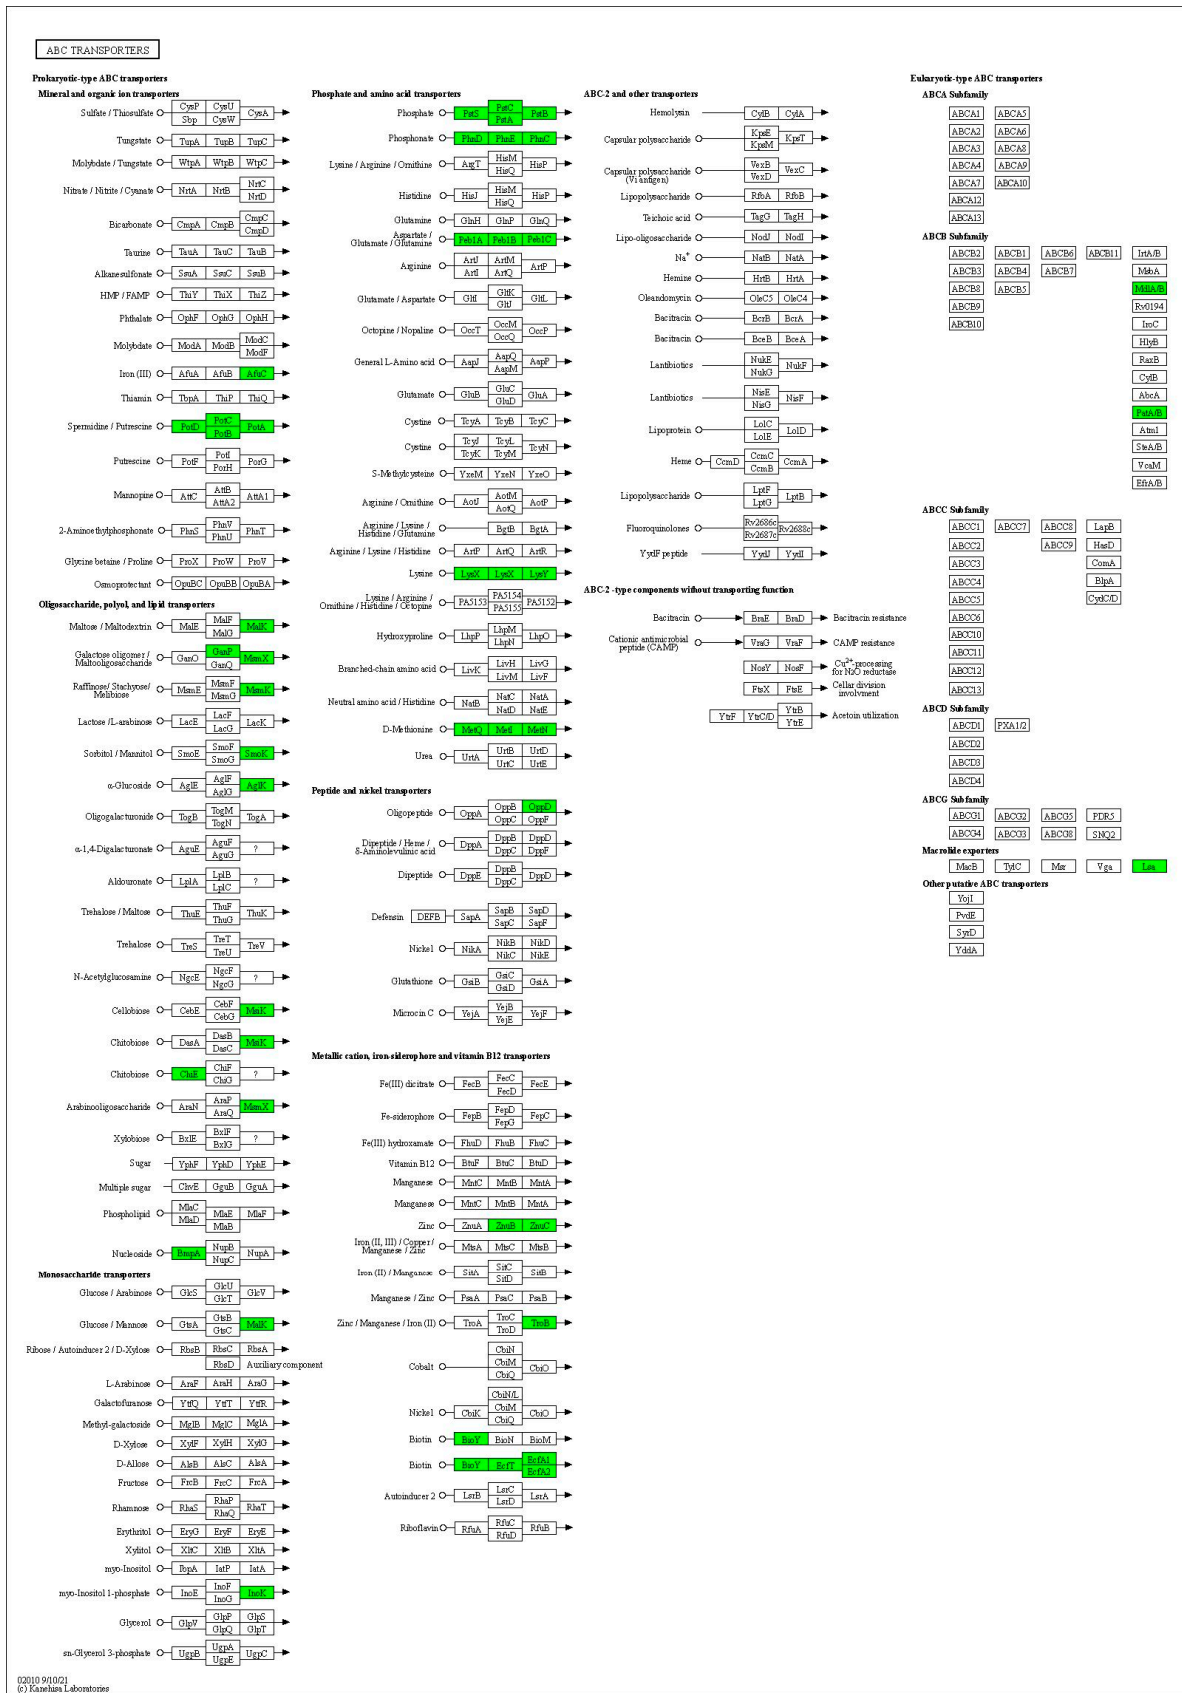

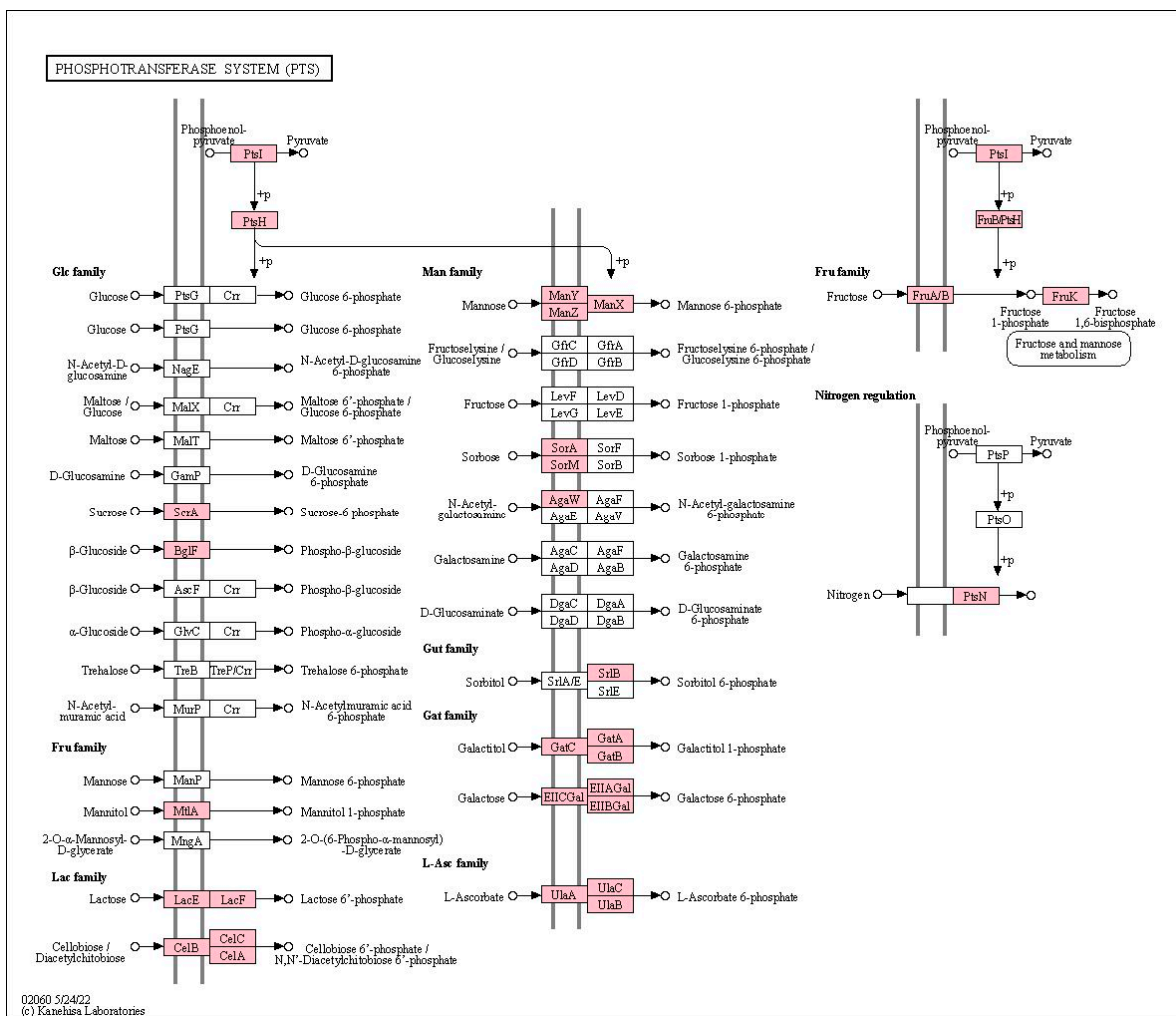

Figure S3. Phosphotransferase systems (PTSs) of *L. paracasei* ABK.

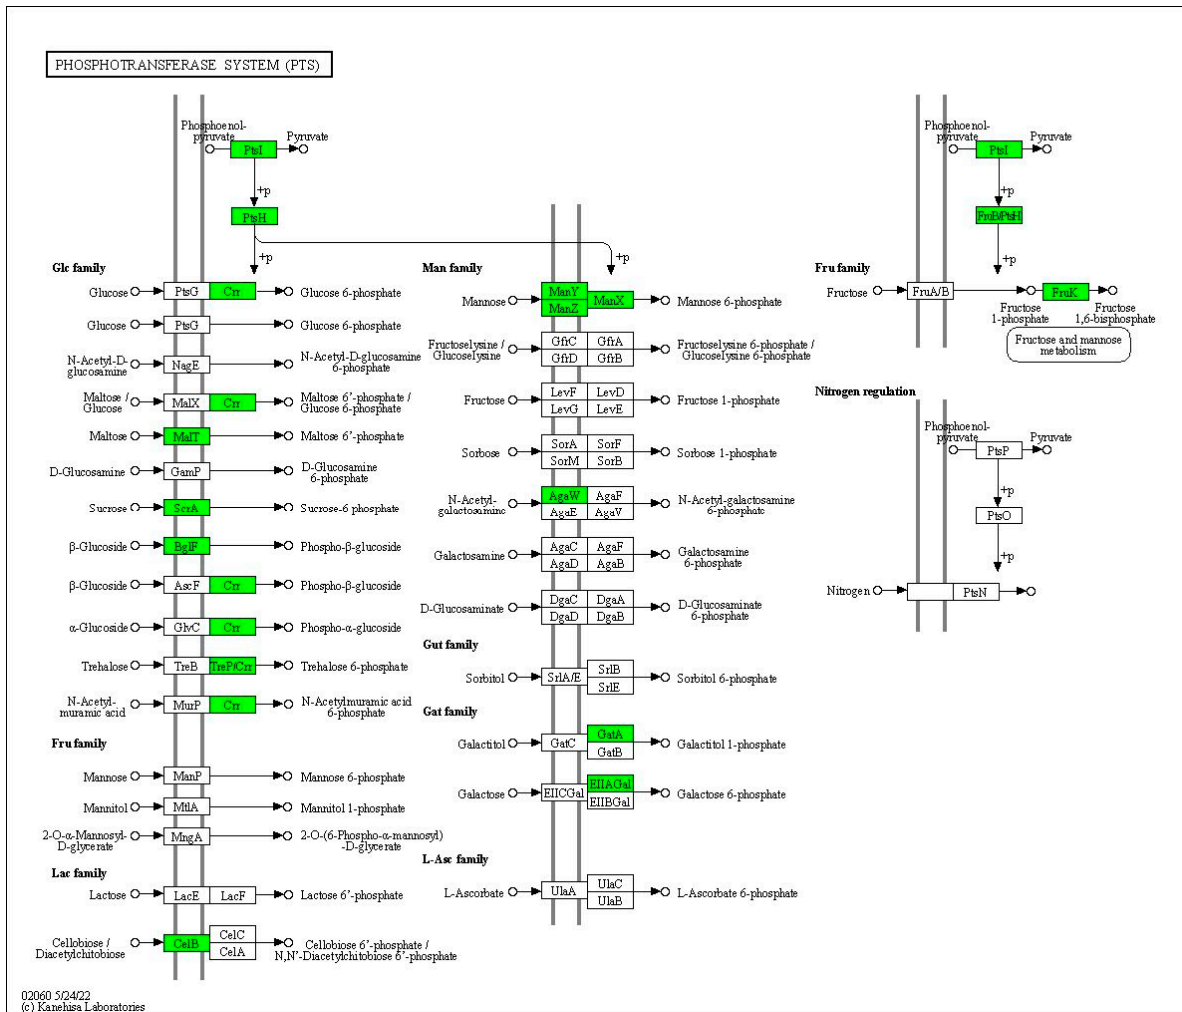

Figure S4. Phosphotransferase systems (PTSs) of *L. helveticus* H9.
